# Supplementary material for: Precursor chemistry for TiO2: titanium complexes with a mixed nitrogen/oxygen ligand sphere
Source: Royal Society of Chemistry journal article supplement (doi:10.1039/b601995a), 2006-01-01
Supplement: b601995a.pdf [file b601995a.pdf]

## Supplementary Information

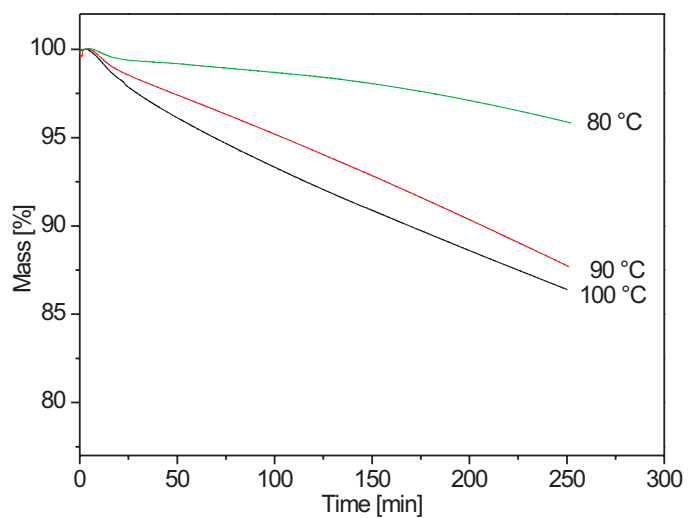

Isothermal studies of compound 3:

Heating rate:

$10\text{ °C} \cdot \text{min}^{-1}$  for  $RT - T_{\text{final}-20^{\circ}\text{C}}$

$3\text{ °C} \cdot \text{min}^{-1}$  for  $T_{\text{final}-20^{\circ}\text{C}} - T_{\text{final}}$

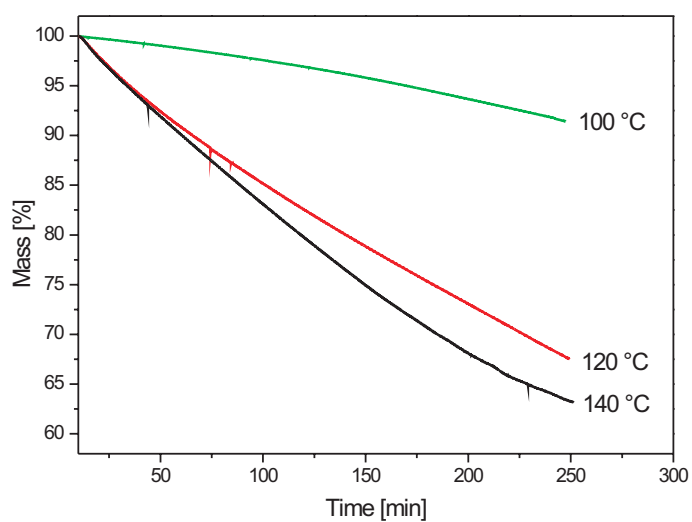

Isothermal studies of compound 4:

Heating rate:

$10\text{ °C} \cdot \text{min}^{-1}$  for  $RT - T_{\text{final}}$
